# Supplementary material
Source: publisher figshare collection journal article supplement (https://brill.figshare.com/articles/dataset/_/25689357)
Supplement: Supplementary file 1 [file 1]

## Sheet: Table S1
Table S1. List of cows and associated metadata and impact of post-milking treatment on the presence of pathogens causing bovine mastitis at D1 and D15 using the PathoProof™ Mastitis Complete-16 Kit. Cows were either treated with Lacticaseibacillus paracasei CIRM BIA 1542 (L), iodine (I) or not treated (N). Presence of pathogens was defined by a number of amplification cycle.
Cow	Treatment	batch	parity1	Staphylococcus aureus		Enterocccus spp.		Corynebacterium bovis		Escherichia coli		Streptococcus dysgalactiae		Staphylococcus spp.		B lactamase Staphylococcus		Streptococcus agalactiae		Streptococcus uberis		Klebsiella oxytoca et/ou Klebsiella pneumoniae		Serratia marcescens		Trueperella/Peptoniphilus		Mycoplasma bovis		Mycoplasma sp.		Yeast		Prothoteca sp.
				D1	D15	D1	D15	D1	D15	D1	D15	D1	D15	D1	D15	D1	D15	D1	D15	D1	D15	D1	D15	D1	D15	D1	D15	D1	D15	D1	D15	D1	D15	D1	D15
C14	N	1	M	>40	>40	>40	>40	>40	>40	39.92	>40	>40	>40	>40	>40	>40	>40	>40	>40	>40	>40	>40	>40	>40	>40	>40	>40	>40	>40	>40	>40	>40	>40	>40	>40
C17	N	1	P	>40	>40	>40	>40	>40	>40	>40	>40	>40	>40	38.65	37.47	38.77	37.7	>40	>40	>40	>40	>40	>40	>40	>40	>40	>40	>40	>40	>40	>40	>40	>40	>40	>40
C19	N	1	P	>40	>40	>40	>40	>40	>40	>40	>40	>40	>40	38.62	35.92	>40	37.41	>40	>40	>40	>40	>40	>40	>40	>40	>40	>40	>40	>40	>40	>40	>40	>40	>40	>40
C24	N	2	M	>40	>40	>40	>40	>40	>40	>40	39.17	>40	>40	37.74	38.33	>40	38.75	>40	>40	>40	>40	>40	>40	>40	>40	>40	>40	>40	>40	>40	>40	>40	>40	>40	>40
C27	N	2	M	>40	>40	>40	>40	>40	>40	39.83	>40	>40	>40	>40	34.97	>40	>40	>40	>40	>40	>40	>40	>40	>40	>40	>40	>40	>40	>40	>40	>40	>40	>40	>40	>40
C32	N	2	P	>40	38.01	>40	>40	>40	>40	>40	>40	>40	>40	37.23	36.51	>40	>40	>40	>40	>40	>40	>40	>40	>40	>40	>40	>40	>40	>40	>40	>40	>40	>40	>40	>40
C15	I	1	M	>40	>40	>40	>40	>40	>40	>40	>40	>40	>40	>40	37.84	>40	37.2	>40	>40	>40	>40	>40	>40	>40	>40	>40	>40	>40	>40	>40	>40	>40	>40	>40	>40
C22	I	1	P	>40	>40	30.89	>40	>40	>40	>40	>40	>40	>40	34.19	37.04	39.55	>40	>40	>40	>40	>40	>40	>40	>40	>40	>40	>40	>40	>40	>40	>40	>40	>40	>40	>40
C23	I	1	P	>40	>40	>40	>40	>40	>40	>40	>40	>40	>40	37.66	>40	39.73	>40	>40	>40	>40	>40	>40	>40	>40	>40	>40	>40	>40	>40	>40	>40	>40	>40	>40	>40
C25	I	2	M	>40	>40	>40	>40	>40	>40	>40	39.37	>40	>40	37.3	38.63	>40	>40	>40	>40	>40	>40	>40	>40	>40	>40	>40	>40	>40	>40	>40	>40	>40	>40	>40	>40
C29	I	2	M	>40	>40	39.01	>40	>40	>40	>40	39.76	>40	>40	39.08	38.88	>40	>40	>40	>40	>40	>40	>40	>40	>40	>40	>40	>40	>40	>40	>40	>40	>40	>40	>40	>40
C31	I	2	P	>40	>40	>40	>40	>40	>40	>40	>40	>40	>40	39.89	39.39	>40	39.9	>40	>40	>40	>40	>40	>40	>40	>40	>40	>40	>40	>40	>40	>40	>40	>40	>40	>40
C13	L	1	M	>40	>40	>40	>40	>40	>40	>40	>40	>40	>40	34.84	35.03	39.08	34.78	>40	>40	>40	>40	>40	>40	>40	>40	>40	>40	>40	>40	>40	>40	>40	>40	>40	>40
C18	L	1	P	>40	>40	>40	>40	>40	>40	>40	>40	>40	>40	36.52	37.52	39.26	37.01	>40	>40	>40	>40	>40	>40	>40	>40	>40	>40	>40	>40	>40	>40	>40	>40	>40	>40
C20	L	1	P	>40	>40	>40	>40	>40	>40	>40	>40	>40	>40	37.4	>40	39.01	39.72	>40	>40	>40	>40	>40	>40	>40	>40	>40	>40	>40	>40	>40	>40	>40	>40	>40	>40
C21	L	1	P	>40	>40	>40	>40	>40	>40	>40	>40	>40	>40	35.78	>40	37.67	>40	>40	>40	>40	>40	>40	>40	>40	>40	>40	>40	>40	>40	>40	>40	>40	>40	>40	>40
C26	L	2	M	>40	>40	>40	>40	>40	>40	>40	>40	>40	>40	39.06	>40	>40	37.4	>40	>40	>40	>40	>40	>40	>40	>40	>40	>40	>40	>40	>40	>40	>40	>40	>40	>40
C28	L	2	M	>40	>40	>40	>40	>40	>40	>40	>40	>40	>40	35.15	33	36.42	35.07	>40	>40	>40	>40	>40	>40	>40	>40	>40	>40	>40	>40	>40	>40	>40	>40	>40	>40
C30	L	2	M	>40	>40	>40	>40	>40	>40	>40	>40	>40	>40	37.96	>40	>40	>40	>40	>40	>40	>40	>40	>40	>40	>40	>40	>40	>40	>40	>40	>40	>40	>40	>40	>40
C33	L	2	P	>40	>40	>40	>40	>40	>40	>40	38.02	>40	>40	31.6	30.98	30.7	30.11	>40	>40	>40	>40	>40	>40	>40	>40	>40	>40	>40	>40	>40	>40	>40	>40	>40	>40
1 parity : primiparous (P) or multiparous (M)

## Sheet: Table S2
Table S2. Antibody panel used for milk cell typing by fluorescence-activated cell sorting (FACS).
Name	Clone	Type	Targeted cell type	Compagny	Catalog number
Anti-bovine CH138A antibody (IgM)	CH138A	primary	Granulocyte	WSU	BOV2067
Brilliant Violet 421 TM anti-mouse IgM antibody	RMM-1	isotype	Primary anti-CH138A isotype control antibody	Biolegend	406517
Brilliant Violet 421 TM rat IgG2a K isotype control antibody	RTK2758	isotype	Secondary anti-CH138A isotype control antibody	Biolegend	400535
CD49f antibody, anti-human/mouse, FITC	GoH3	conjugated	Mammary epithelial cells	Miltenyi	130-097-245
FITC rat IgG2a FITC conjugated control antibody	ES26-15B7.3	isotype	Primary anti CD49f isotype control antibody	Miltenyi	130-102-653

## Sheet: Table S3
Table S3. Impact of post-milking treatment on the beta-diversity of teat skin and foremilk microbiota at D15 and D15E. Cows were either treated with Lacticaseibacillus paracasei CIRM BIA 1542 (L), iodine (I) or not treated (N). Bray-Curtis, Jaccard, UniFrac and wUniFrac distances were used to represent the beta-diversity of each condition.
		Bray-Curtis		Jaccard		UniFrac		wUniFrac
Sample	Day	R2 1	p 2	R2	p	R2	p	R2	p
Teat skin	D15	0.0534	**	0.0501	**	0.0392	*	0.0540	.
	D15E	0.109	***	0.0962	***	0.0707	*	0.117	*
Foremilk	D15	0.0385	*	0.0354	*	0.0285	NS	0.0441	.
	D15E	0.0908	***	0.0803	***	0.0601	NS	0.0924	*
1 The R2 value indicates the contribution of the treatment to the beta-diversity of microbiota.
2 PERMANOVA analysis was used to obtain statistical data; *** p < 0.001, ** p < 0.01, * p < 0.05, . p < 0.1. NS means not significant.

## Sheet: Table S4
Table S4. Differential abundance analysis of the total microbiota on teat skin at D15. Cows were either treated with Lacticaseibacillus paracasei CIRM BIA 1542 (L), iodine (I) or not treated (N). log2 Fold Change was used to quantify the difference of OTU abundance between I and L, L and N and finally I and N.
1 A positive log2FoldChange means more abundant in I than L while a negative log2FoldChange means less abundant in I than L.
2 NA means that no significant effect was observed for the identified OTU.
OTU	Kingdom	Phylum	Class	Order	Family	Genus	Species	log2FoldChange IL1	pval IL	log2FoldChange LN	pval LN	log2FoldChange IN	pval IN
Cluster_60	Bacteria	Actinobacteriota	Actinobacteria	Bifidobacteriales	Bifidobacteriaceae	Bifidobacterium	Bifidobacterium merycicum	-2.245	1.085e-8	2.215	3.861e-8	NA	NA
Cluster_383	Bacteria	Actinobacteriota	Actinobacteria	Bifidobacteriales	Bifidobacteriaceae	Bifidobacterium	Bifidobacterium ruminantium	-2.251	1.815e-9	2.055	8.202e-8	NA	NA
Cluster_67	Bacteria	Actinobacteriota	Actinobacteria	Corynebacteriales	Corynebacteriaceae	Corynebacterium	Corynebacterium camporealensis	-1.404	0.002049	1.528	0.001074	NA	NA
Cluster_1331	Bacteria	Actinobacteriota	Actinobacteria	Corynebacteriales	Corynebacteriaceae	Corynebacterium	Corynebacterium sp.	-1.84	0.0035	NA	NA	NA	NA
Cluster_706	Bacteria	Actinobacteriota	Actinobacteria	Corynebacteriales	Corynebacteriaceae	Corynebacterium	Multi-affiliation	-2.915	3.159e-05	NA	NA	NA	NA
Cluster_120	Bacteria	Actinobacteriota	Actinobacteria	Corynebacteriales	Corynebacteriaceae	Corynebacterium	Multi-affiliation	-2.182	0.0002488	NA	NA	NA	NA
Cluster_1264	Bacteria	Actinobacteriota	Actinobacteria	Corynebacteriales	Corynebacteriaceae	Corynebacterium	Multi-affiliation	-1.776	0.0001851	NA	NA	-2.049	6.302e-05
Cluster_191	Bacteria	Actinobacteriota	Actinobacteria	Corynebacteriales	Corynebacteriaceae	Corynebacterium	Multi-affiliation	-1.546	0.004587	NA	NA	NA	NA
Cluster_719	Bacteria	Actinobacteriota	Actinobacteria	Corynebacteriales	Corynebacteriaceae	Corynebacterium	Multi-affiliation	2.878	1.956e-05	NA	NA	NA	NA
Cluster_691	Bacteria	Actinobacteriota	Actinobacteria	Micrococcales	Brevibacteriaceae	Brevibacterium		3.414	0.001584	NA	NA	4.842	4.961e-05
Cluster_1314	Bacteria	Actinobacteriota	Actinobacteria	Micrococcales	Dermabacteraceae	Brachybacterium	Multi-affiliation	-1.4	0.003896	NA	NA	NA	NA
Cluster_136	Bacteria	Actinobacteriota	Coriobacteriia	Coriobacteriales	Eggerthellaceae			0.9718	0.0001599	NA	NA	NA	NA
Cluster_796	Bacteria	Bacteroidota	Bacteroidia	Bacteroidales	Bacteroidaceae	Bacteroides		-1.237	0.002743	NA	NA	NA	NA
Cluster_892	Bacteria	Bacteroidota	Bacteroidia	Bacteroidales	Bacteroidales RF16 group			-1.662	1.077e-06	NA	NA	NA	NA
Cluster_2341	Bacteria	Bacteroidota	Bacteroidia	Bacteroidales	Bacteroidales RF16 group			-1.415	0.004456	NA	NA	NA	NA
Cluster_2527	Bacteria	Bacteroidota	Bacteroidia	Bacteroidales	Bacteroidales RF16 group			-1.349	0.001613	NA	NA	NA	NA
Cluster_1115	Bacteria	Bacteroidota	Bacteroidia	Bacteroidales	Bacteroidales RF16 group			-1.108	0.00463	NA	NA	NA	NA
Cluster_230	Bacteria	Bacteroidota	Bacteroidia	Bacteroidales	Bacteroidales RF16 group			-1.106	0.0003249	NA	NA	NA	NA
Cluster_488	Bacteria	Bacteroidota	Bacteroidia	Bacteroidales	Bacteroidales RF16 group			-1.074	0.0005764	NA	NA	NA	NA
Cluster_241	Bacteria	Bacteroidota	Bacteroidia	Bacteroidales	Muribaculaceae			-0.8279	0.0007408	NA	NA	NA	NA
Cluster_331	Bacteria	Bacteroidota	Bacteroidia	Bacteroidales	p-251-o5			-1.428	4.605e-05	NA	NA	NA	NA
Cluster_709	Bacteria	Bacteroidota	Bacteroidia	Bacteroidales	p-251-o5			1.946	0.0002035	NA	NA	NA	NA
Cluster_888	Bacteria	Bacteroidota	Bacteroidia	Bacteroidales	Porphyromonadaceae	Porphyromonas		-3.112	0.001235	NA	NA	NA	NA
Cluster_1190	Bacteria	Bacteroidota	Bacteroidia	Bacteroidales	Prevotellaceae	Prevotella		-1.32	0.003496	NA	NA	NA	NA
Cluster_817	Bacteria	Bacteroidota	Bacteroidia	Bacteroidales	Prevotellaceae	Prevotellaceae UCG-003		-1.169	0.0006458	1.137	0.001222	NA	NA
Cluster_375	Bacteria	Bacteroidota	Bacteroidia	Bacteroidales	Prevotellaceae	Prevotellaceae UCG-003		1.655	0.0001161	NA	NA	NA	NA
Cluster_1539	Bacteria	Bacteroidota	Bacteroidia	Bacteroidales	Rikenellaceae	Alistipes		-1.563	0.00237	NA	NA	NA	NA
Cluster_1551	Bacteria	Bacteroidota	Bacteroidia	Bacteroidales	Rikenellaceae	Alistipes		-1.387	0.0003966	NA	NA	NA	NA
Cluster_524	Bacteria	Bacteroidota	Bacteroidia	Bacteroidales	Rikenellaceae	Alistipes		-0.9561	0.003847	NA	NA	NA	NA
Cluster_2220	Bacteria	Bacteroidota	Bacteroidia	Bacteroidales	Rikenellaceae	Rikenellaceae RC9 gut group		-1.985	1.831e-05	NA	NA	NA	NA
Cluster_2324	Bacteria	Bacteroidota	Bacteroidia	Bacteroidales	Rikenellaceae	Rikenellaceae RC9 gut group		-1.515	0.004519	NA	NA	NA	NA
Cluster_2250	Bacteria	Bacteroidota	Bacteroidia	Bacteroidales	Rikenellaceae	Rikenellaceae RC9 gut group		-1.491	0.001975	NA	NA	NA	NA
Cluster_373	Bacteria	Bacteroidota	Bacteroidia	Bacteroidales	Rikenellaceae	Rikenellaceae RC9 gut group		-1.459	9.179e-06	NA	NA	NA	NA
Cluster_2316	Bacteria	Bacteroidota	Bacteroidia	Bacteroidales	Rikenellaceae	Rikenellaceae RC9 gut group		-1.361	0.002061	NA	NA	NA	NA
Cluster_1067	Bacteria	Bacteroidota	Bacteroidia	Bacteroidales	Rikenellaceae	Rikenellaceae RC9 gut group		-1.284	0.0003162	NA	NA	NA	NA
Cluster_1426	Bacteria	Bacteroidota	Bacteroidia	Bacteroidales	Rikenellaceae	Rikenellaceae RC9 gut group		-1.238	0.002039	NA	NA	NA	NA
Cluster_2037	Bacteria	Bacteroidota	Bacteroidia	Bacteroidales	Rikenellaceae	Rikenellaceae RC9 gut group		-0.9336	0.001676	NA	NA	NA	NA
Cluster_89	Bacteria	Bacteroidota	Bacteroidia	Bacteroidales	Rikenellaceae	Rikenellaceae RC9 gut group		-0.7743	0.002412	NA	NA	NA	NA
Cluster_1997	Bacteria	Bacteroidota	Bacteroidia	Bacteroidales				-1.149	0.002331	NA	NA	NA	NA
Cluster_164	Archaea	Euryarchaeota	Methanobacteria	Methanobacteriales	Methanobacteriaceae	Methanobrevibacter	Multi-affiliation	0.8804	0.0004085	NA	NA	NA	NA
Cluster_73	Archaea	Euryarchaeota	Methanobacteria	Methanobacteriales	Methanobacteriaceae	Methanobrevibacter		0.6892	0.0009526	NA	NA	NA	NA
Cluster_528	Bacteria	Firmicutes	Bacilli	Bacillales	Planococcaceae	Multi-affiliation	Multi-affiliation	1.851	0.0007347	NA	NA	NA	NA
Cluster_511	Bacteria	Firmicutes	Bacilli	Erysipelotrichales	Erysipelotrichaceae	Erysipelotrichaceae UCG-008		0.8622	0.0009234	NA	NA	NA	NA
Cluster_829	Bacteria	Firmicutes	Bacilli	Erysipelotrichales	Erysipelotrichaceae	Erysipelotrichaceae UCG-009		0.9355	0.003998	NA	NA	NA	NA
Cluster_1079	Bacteria	Firmicutes	Bacilli	Erysipelotrichales	Erysipelotrichaceae	Erysipelotrichaceae UCG-009		1.083	0.002848	NA	NA	NA	NA
Cluster_1081	Bacteria	Firmicutes	Bacilli	Erysipelotrichales	Erysipelotrichaceae	Solobacterium		1.173	0.001837	NA	NA	NA	NA
Cluster_475	Bacteria	Firmicutes	Bacilli	Lactobacillales	Aerococcaceae	Facklamia		1.231	0.004178	NA	NA	NA	NA
Cluster_276	Bacteria	Firmicutes	Bacilli	Lactobacillales	Carnobacteriaceae	Alloiococcus	bacterium #1 from Psoroptes ovis	-3.315	0.0004104	4.017	4.166e-05	NA	NA
Cluster_4050	Bacteria	Firmicutes	Bacilli	Lactobacillales	Carnobacteriaceae	Alloiococcus	bacterium #1 from Psoroptes ovis	-3.143	0.0002047	NA	NA	NA	NA
Cluster_15	Bacteria	Firmicutes	Bacilli	Lactobacillales	Carnobacteriaceae	Alloiococcus	bacterium #1 from Psoroptes ovis	-2.263	2.95e-05	NA	NA	NA	NA
Cluster_534	Bacteria	Firmicutes	Bacilli	Lactobacillales	Carnobacteriaceae	Atopostipes		-2.367	0.00153	2.947	0.0001646	NA	NA
Cluster_22	Bacteria	Firmicutes	Bacilli	Lactobacillales	Lactobacillaceae	Lacticaseibacillus	Lactobacillus paracasei	-11.62	9.151e-41	11.62	1.466e-38	NA	NA
Cluster_5	Bacteria	Firmicutes	Bacilli	Lactobacillales	Lactobacillaceae	Lacticaseibacillus	Multi-affiliation	-13.48	3.224e-58	13.04	6.740e-52	NA2	NA
Cluster_1217	Bacteria	Firmicutes	Bacilli	Lactobacillales	Lactobacillaceae	Lacticaseibacillus	Multi-affiliation	-7.479	6.314e-22	7.475	9.676e-21	NA	NA
Cluster_1687	Bacteria	Firmicutes	Bacilli	Lactobacillales	Lactobacillaceae	Lacticaseibacillus	Multi-affiliation	-7.185	1.210e-13	7.18	5.724e-13	NA	NA
Cluster_1469	Bacteria	Firmicutes	Bacilli	Lactobacillales	Multi-affiliation	Multi-affiliation	Multi-affiliation	-7.411	5.036e-15	7.407	2.853e-14	NA	NA
Cluster_1295	Bacteria	Firmicutes	Bacilli	RF39				-1.035	0.00137	1.854	2.343e-7	NA	NA
Cluster_10	Bacteria	Firmicutes	Bacilli	Staphylococcales	Staphylococcaceae	Staphylococcus	Staphylococcus chromogenes	-2.614	0.003451	NA	NA	NA	NA
Cluster_282	Bacteria	Firmicutes	Bacilli	Staphylococcales	Staphylococcaceae	Staphylococcus	Staphylococcus felis	-1.846	0.0002531	NA	NA	NA	NA
Cluster_229	Bacteria	Firmicutes	Clostridia	Christensenellales	Christensenellaceae	Christensenellaceae R-7 group		0.5193	0.001453	NA	NA	NA	NA
Cluster_327	Bacteria	Firmicutes	Clostridia	Christensenellales	Christensenellaceae	Christensenellaceae R-7 group		0.9001	3.186e-05	NA	NA	NA	NA
Cluster_867	Bacteria	Firmicutes	Clostridia	Christensenellales	Christensenellaceae	Christensenellaceae R-7 group		0.9475	0.004426	NA	NA	NA	NA
Cluster_442	Bacteria	Firmicutes	Clostridia	Christensenellales	Christensenellaceae	Christensenellaceae R-7 group		1.02	3.255e-05	NA	NA	NA	NA
Cluster_761	Bacteria	Firmicutes	Clostridia	Christensenellales	Christensenellaceae	Christensenellaceae R-7 group		1.214	0.0001209	NA	NA	NA	NA
Cluster_419	Bacteria	Firmicutes	Clostridia	Christensenellales	Christensenellaceae	Christensenellaceae R-7 group		1.368	7.483e-8	NA	NA	NA	NA
Cluster_2567	Bacteria	Firmicutes	Clostridia	Christensenellales	Christensenellaceae	Christensenellaceae R-7 group		1.419	8.497e-05	-1.595	1.47e-05	NA	NA
Cluster_596	Bacteria	Firmicutes	Clostridia	Clostridia UCG-014				-0.814	0.001557	NA	NA	NA	NA
Cluster_721	Bacteria	Firmicutes	Clostridia	Clostridia UCG-014				0.6744	0.004221	NA	NA	NA	NA
Cluster_54	Bacteria	Firmicutes	Clostridia	Clostridia UCG-014				0.8075	0.0008297	NA	NA	NA	NA
Cluster_106	Bacteria	Firmicutes	Clostridia	Clostridia UCG-014				0.9545	0.0001744	NA	NA	NA	NA
Cluster_420	Bacteria	Firmicutes	Clostridia	Clostridia UCG-014				1.072	0.0009204	-1.058	0.001434	NA	NA
Cluster_1112	Bacteria	Firmicutes	Clostridia	Clostridia UCG-014				1.092	0.0002947	NA	NA	NA	NA
Cluster_1384	Bacteria	Firmicutes	Clostridia	Clostridia UCG-014				1.278	0.0007733	NA	NA	NA	NA
Cluster_1419	Bacteria	Firmicutes	Clostridia	Clostridia UCG-014				1.356	0.0003657	NA	NA	NA	NA
Cluster_1394	Bacteria	Firmicutes	Clostridia	Clostridia UCG-014				1.731	0.0008742	NA	NA	NA	NA
Cluster_2172	Bacteria	Firmicutes	Clostridia	Clostridia vadinBB60 group				-3.958	1.088e-7	NA	NA	NA	NA
Cluster_1538	Bacteria	Firmicutes	Clostridia	Clostridia vadinBB60 group				-1.331	0.000471	NA	NA	NA	NA
Cluster_1296	Bacteria	Firmicutes	Clostridia	Clostridiales	Clostridiaceae	Clostridium sensu stricto 1		-3.366	1.944e-8	NA	NA	NA	NA
Cluster_283	Bacteria	Firmicutes	Clostridia	Eubacteriales	Anaerofustaceae	Anaerofustis		1.033	6.013e-05	NA	NA	NA	NA
Cluster_685	Bacteria	Firmicutes	Clostridia	Lachnospirales	Lachnospiraceae	Agathobacter		-1.11	4.547e-05	1.023	0.0002465	NA	NA
Cluster_1696	Bacteria	Firmicutes	Clostridia	Lachnospirales	Lachnospiraceae	Anaerosporobacter		-1.371	9.98e-05	NA	NA	NA	NA
Cluster_623	Bacteria	Firmicutes	Clostridia	Lachnospirales	Lachnospiraceae	Butyrivibrio	Butyrivibrio crossotus	-1.107	0.001951	NA	NA	NA	NA
Cluster_516	Bacteria	Firmicutes	Clostridia	Lachnospirales	Lachnospiraceae	Coprococcus		-0.8002	0.003124	NA	NA	NA	NA
Cluster_398	Bacteria	Firmicutes	Clostridia	Lachnospirales	Lachnospiraceae	Coprococcus		0.9683	0.000374	NA	NA	NA	NA
Cluster_83	Bacteria	Firmicutes	Clostridia	Lachnospirales	Lachnospiraceae	Dorea		-0.4695	0.0009265	NA	NA	NA	NA
Cluster_1590	Bacteria	Firmicutes	Clostridia	Lachnospirales	Lachnospiraceae	Lachnospiraceae AC2044 group		2.468	1.924e-06	NA	NA	NA	NA
Cluster_661	Bacteria	Firmicutes	Clostridia	Lachnospirales	Lachnospiraceae	Lachnospiraceae NC2004 group		-1.064	1.789e-05	NA	NA	NA	NA
Cluster_437	Bacteria	Firmicutes	Clostridia	Lachnospirales	Lachnospiraceae	Lachnospiraceae NC2004 group		-0.9012	0.002523	NA	NA	NA	NA
Cluster_1241	Bacteria	Firmicutes	Clostridia	Lachnospirales	Lachnospiraceae	Lachnospiraceae NK3A20 group		1.144	0.001634	NA	NA	NA	NA
Cluster_495	Bacteria	Firmicutes	Clostridia	Lachnospirales	Lachnospiraceae	Lachnospiraceae NK4A136 group		-1.472	5.722e-06	NA	NA	NA	NA
Cluster_1025	Bacteria	Firmicutes	Clostridia	Lachnospirales	Lachnospiraceae	Marvinbryantia		-1.127	0.001736	2.009	4.494e-7	NA	NA
Cluster_842	Bacteria	Firmicutes	Clostridia	Lachnospirales	Lachnospiraceae	Roseburia		-1.011	0.002931	NA	NA	NA	NA
Cluster_1732	Bacteria	Firmicutes	Clostridia	Lachnospirales	Lachnospiraceae			-1.042	0.004339	NA	NA	NA	NA
Cluster_951	Bacteria	Firmicutes	Clostridia	Lachnospirales	Lachnospiraceae			-0.9533	0.002713	NA	NA	NA	NA
Cluster_983	Bacteria	Firmicutes	Clostridia	Lachnospirales	Lachnospiraceae			-0.9176	0.0007619	0.9963	0.0003976	NA	NA
Cluster_1786	Bacteria	Firmicutes	Clostridia	Monoglobales	Monoglobaceae	Monoglobus		-2.791	0.001404	3.081	0.0006681	NA	NA
Cluster_1513	Bacteria	Firmicutes	Clostridia	Monoglobales	Monoglobaceae	Monoglobus		1.048	0.0006202	NA	NA	1.686	1.44e-06
Cluster_905	Bacteria	Firmicutes	Clostridia	Monoglobales	Monoglobaceae	Monoglobus		1.092	0.0006009	NA	NA	NA	NA
Cluster_1613	Bacteria	Firmicutes	Clostridia	Oscillospirales	[Eubacterium] coprostanoligenes group			-1.432	0.001761	NA	NA	NA	NA
Cluster_967	Bacteria	Firmicutes	Clostridia	Oscillospirales	[Eubacterium] coprostanoligenes group			-1.187	0.0001537	NA	NA	NA	NA
Cluster_639	Bacteria	Firmicutes	Clostridia	Oscillospirales	[Eubacterium] coprostanoligenes group			-1.071	6.668e-05	NA	NA	NA	NA
Cluster_1252	Bacteria	Firmicutes	Clostridia	Oscillospirales	[Eubacterium] coprostanoligenes group			1.343	0.0003815	NA	NA	NA	NA
Cluster_775	Bacteria	Firmicutes	Clostridia	Oscillospirales	[Eubacterium] coprostanoligenes group			3.113	2.538e-7	NA	NA	NA	NA
Cluster_883	Bacteria	Firmicutes	Clostridia	Oscillospirales	Butyricicoccaceae	UCG-009		0.81	0.003876	NA	NA	NA	NA
Cluster_490	Bacteria	Firmicutes	Clostridia	Oscillospirales	Hungateiclostridiaceae	Saccharofermentans		0.9312	0.002098	NA	NA	NA	NA
Cluster_1153	Bacteria	Firmicutes	Clostridia	Oscillospirales	Oscillospiraceae	UCG-005		-2.497	1.318e-10	1.427	0.0002024	NA	NA
Cluster_712	Bacteria	Firmicutes	Clostridia	Oscillospirales	Oscillospiraceae	UCG-005		-1.506	3.753e-05	1.325	0.000399	NA	NA
Cluster_1481	Bacteria	Firmicutes	Clostridia	Oscillospirales	Oscillospiraceae	UCG-005		-1.386	0.0001732	NA	NA	NA	NA
Cluster_1013	Bacteria	Firmicutes	Clostridia	Oscillospirales	Oscillospiraceae	UCG-005		-1.375	0.001715	NA	NA	NA	NA
Cluster_1480	Bacteria	Firmicutes	Clostridia	Oscillospirales	Oscillospiraceae	UCG-005		-1.327	0.0005005	NA	NA	NA	NA
Cluster_1705	Bacteria	Firmicutes	Clostridia	Oscillospirales	Oscillospiraceae	UCG-005		-1.323	0.001487	1.396	0.001199	NA	NA
Cluster_1164	Bacteria	Firmicutes	Clostridia	Oscillospirales	Oscillospiraceae	UCG-005		-1.209	3.455e-05	1.14	0.0001409	NA	NA
Cluster_1072	Bacteria	Firmicutes	Clostridia	Oscillospirales	Oscillospiraceae	UCG-005		-1.075	0.002017	NA	NA	NA	NA
Cluster_66	Bacteria	Firmicutes	Clostridia	Oscillospirales	Oscillospiraceae	UCG-005		-1.046	1.125e-05	1.038	2.163e-05	NA	NA
Cluster_665	Bacteria	Firmicutes	Clostridia	Oscillospirales	Oscillospiraceae	UCG-005		-0.9379	0.0003233	NA	NA	NA	NA
Cluster_30	Bacteria	Firmicutes	Clostridia	Oscillospirales	Oscillospiraceae	UCG-005		-0.8666	1.366e-05	0.8278	5.122e-05	NA	NA
Cluster_465	Bacteria	Firmicutes	Clostridia	Oscillospirales	Oscillospiraceae	UCG-005		-0.8609	0.0007026	NA	NA	NA	NA
Cluster_75	Bacteria	Firmicutes	Clostridia	Oscillospirales	Oscillospiraceae	UCG-005		-0.8044	7.141e-05	0.7089	0.0006419	NA	NA
Cluster_1206	Bacteria	Firmicutes	Clostridia	Oscillospirales	Oscillospiraceae	UCG-005		-0.7745	0.003056	NA	NA	NA	NA
Cluster_158	Bacteria	Firmicutes	Clostridia	Oscillospirales	Oscillospiraceae	UCG-005		-0.7024	0.002874	0.8302	0.000609	NA	NA
Cluster_223	Bacteria	Firmicutes	Clostridia	Oscillospirales	Oscillospiraceae	UCG-005		-0.6067	0.001373	NA	NA	NA	NA
Cluster_88	Bacteria	Firmicutes	Clostridia	Oscillospirales	Oscillospiraceae	UCG-005		-0.5829	0.002045	NA	NA	NA	NA
Cluster_51	Bacteria	Firmicutes	Clostridia	Oscillospirales	Oscillospiraceae	UCG-005		-0.523	0.004411	NA	NA	NA	NA
Cluster_16	Bacteria	Firmicutes	Clostridia	Oscillospirales	Oscillospiraceae	UCG-005		-0.4608	0.004479	NA	NA	NA	NA
Cluster_79	Bacteria	Firmicutes	Clostridia	Oscillospirales	Oscillospiraceae			-0.7165	0.0001467	NA	NA	NA	NA
Cluster_318	Bacteria	Firmicutes	Clostridia	Oscillospirales	Oscillospiraceae			-0.6511	0.0009132	NA	NA	NA	NA
Cluster_1174	Bacteria	Firmicutes	Clostridia	Oscillospirales	Ruminococcaceae	Ruminococcus		-1.3	0.003784	NA	NA	NA	NA
Cluster_254	Bacteria	Firmicutes	Clostridia	Oscillospirales	Ruminococcaceae	Ruminococcus		-1.032	2.279e-06	0.8144	0.0002585	NA	NA
Cluster_1686	Bacteria	Firmicutes	Clostridia	Oscillospirales	UCG-010			-2.311	0.000329	NA	NA	NA	NA
Cluster_1269	Bacteria	Firmicutes	Clostridia	Oscillospirales	UCG-010			-2.302	0.0003821	2.188	0.0009842	NA	NA
Cluster_808	Bacteria	Firmicutes	Clostridia	Oscillospirales	UCG-010			-2.026	0.0001375	NA	NA	NA	NA
Cluster_1011	Bacteria	Firmicutes	Clostridia	Oscillospirales	UCG-010			-1.721	0.003859	NA	NA	NA	NA
Cluster_2520	Bacteria	Firmicutes	Clostridia	Oscillospirales	UCG-010			-1.527	0.002466	NA	NA	NA	NA
Cluster_1039	Bacteria	Firmicutes	Clostridia	Oscillospirales	UCG-010			-1.498	0.001274	NA	NA	NA	NA
Cluster_1749	Bacteria	Firmicutes	Clostridia	Oscillospirales	UCG-010			-1.431	0.002491	NA	NA	NA	NA
Cluster_469	Bacteria	Firmicutes	Clostridia	Oscillospirales	UCG-010			-1.413	0.0004104	NA	NA	NA	NA
Cluster_332	Bacteria	Firmicutes	Clostridia	Oscillospirales	UCG-010			-1.34	0.000237	NA	NA	NA	NA
Cluster_1405	Bacteria	Firmicutes	Clostridia	Oscillospirales	UCG-010			-1.314	0.001845	NA	NA	NA	NA
Cluster_1414	Bacteria	Firmicutes	Clostridia	Oscillospirales	UCG-010			-1.297	0.002497	NA	NA	NA	NA
Cluster_1045	Bacteria	Firmicutes	Clostridia	Oscillospirales	UCG-010			-1.189	0.004502	NA	NA	NA	NA
Cluster_326	Bacteria	Firmicutes	Clostridia	Oscillospirales	UCG-010			-1.081	0.002152	NA	NA	NA	NA
Cluster_882	Bacteria	Firmicutes	Clostridia	Oscillospirales	UCG-010			-1.036	0.003151	NA	NA	NA	NA
Cluster_1037	Bacteria	Firmicutes	Clostridia	Oscillospirales	UCG-010			-0.9342	0.001451	NA	NA	NA	NA
Cluster_2121	Bacteria	Firmicutes	Negativicutes	Veillonellales-Selenomonadales				-1.811	0.0004134	2.75	6.838e-7	NA	NA
Cluster_477	Bacteria	Fusobacteriota	Fusobacteriia	Fusobacteriales	Fusobacteriaceae	Fusobacterium	Fusobacterium necrophorum	-2.871	3.081e-05	3.888	2.236e-7	NA	NA
Cluster_183	Bacteria	Patescibacteria	Saccharimonadia	Saccharimonadales	Saccharimonadaceae	Candidatus Saccharimonas		0.7347	0.00468	NA	NA	NA	NA
Cluster_194	Bacteria	Patescibacteria	Saccharimonadia	Saccharimonadales	Saccharimonadaceae	Candidatus Saccharimonas		0.7358	0.002266	NA	NA	NA	NA
Cluster_359	Bacteria	Patescibacteria	Saccharimonadia	Saccharimonadales	Saccharimonadaceae	Candidatus Saccharimonas		0.7802	0.004745	NA	NA	NA	NA
Cluster_39	Bacteria	Patescibacteria	Saccharimonadia	Saccharimonadales	Saccharimonadaceae	Candidatus Saccharimonas		0.7973	2.04e-05	NA	NA	NA	NA
Cluster_358	Bacteria	Patescibacteria	Saccharimonadia	Saccharimonadales	Saccharimonadaceae	Candidatus Saccharimonas		0.9191	0.002307	NA	NA	NA	NA
Cluster_1259	Bacteria	Patescibacteria	Saccharimonadia	Saccharimonadales	Saccharimonadaceae	Candidatus Saccharimonas		1.188	0.002527	NA	NA	NA	NA
Cluster_960	Bacteria	Patescibacteria	Saccharimonadia	Saccharimonadales	Saccharimonadaceae	Candidatus Saccharimonas		1.26	0.000286	NA	NA	NA	NA
Cluster_1030	Bacteria	Patescibacteria	Saccharimonadia	Saccharimonadales	Saccharimonadaceae	Candidatus Saccharimonas		1.352	0.0009462	NA	NA	NA	NA
Cluster_1576	Bacteria	Patescibacteria	Saccharimonadia	Saccharimonadales	Saccharimonadaceae	Candidatus Saccharimonas		1.398	0.0035	NA	NA	NA	NA
Cluster_1308	Bacteria	Patescibacteria	Saccharimonadia	Saccharimonadales	Saccharimonadaceae	Candidatus Saccharimonas		1.432	0.0008018	NA	NA	NA	NA
Cluster_1266	Bacteria	Patescibacteria	Saccharimonadia	Saccharimonadales	Saccharimonadaceae	Candidatus Saccharimonas		2.075	0.0005395	NA	NA	NA	NA
Cluster_2457	Bacteria	Patescibacteria	Saccharimonadia	Saccharimonadales	Saccharimonadaceae	Candidatus Saccharimonas		2.219	0.0002384	NA	NA	NA	NA
Cluster_1723	Bacteria	Planctomycetota	Planctomycetes	Pirellulales	Pirellulaceae	p-1088-a5 gut group		0.8362	0.003524	NA	NA	NA	NA
Cluster_169	Bacteria	Proteobacteria	Gammaproteobacteria	Burkholderiales	Sutterellaceae	Parasutterella		-0.9767	8.36e-05	1.036	4.995e-05	NA	NA
Cluster_2508	Bacteria	Proteobacteria	Gammaproteobacteria	Burkholderiales	Sutterellaceae	Sutterella		-1.162	0.003303	NA	NA	NA	NA
Cluster_619	Bacteria	Proteobacteria	Gammaproteobacteria	Enterobacterales	Enterobacteriaceae	Escherichia-Shigella	Multi-affiliation	2.534	0.003543	NA	NA	NA	NA
Cluster_1087	Bacteria	Proteobacteria	Gammaproteobacteria	Enterobacterales	Succinivibrionaceae	Succinivibrio		-2.27	3.427e-06	NA	NA	NA	NA
Cluster_854	Bacteria	Proteobacteria	Gammaproteobacteria	Enterobacterales	Succinivibrionaceae	Succinivibrio		-2.228	4.586e-05	NA	NA	NA	NA
Cluster_246	Bacteria	Proteobacteria	Gammaproteobacteria	Pseudomonadales	Halomonadaceae	Marinospirillum	Marinospirillum minutulum	3.471	2.055e-8	-2.872	6.274e-06	NA	NA
Cluster_1181	Bacteria	Proteobacteria	Gammaproteobacteria	Pseudomonadales	Moraxellaceae	Acinetobacter	Acinetobacter sp.	3.063	5.835e-05	-3.199	4.103e-05	NA	NA
Cluster_165	Bacteria	Proteobacteria	Gammaproteobacteria	Pseudomonadales	Moraxellaceae	Acinetobacter	Multi-affiliation	2.668	1.394e-05	NA	NA	NA	NA
Cluster_25	Bacteria	Proteobacteria	Gammaproteobacteria	Pseudomonadales	Moraxellaceae	Acinetobacter		2.541	9.168e-06	NA	NA	NA	NA
Cluster_560	Bacteria	Proteobacteria	Gammaproteobacteria	Pseudomonadales	Moraxellaceae	Acinetobacter		2.753	0.0001419	NA	NA	NA	NA
Cluster_910	Bacteria	Proteobacteria	Gammaproteobacteria	Pseudomonadales	Moraxellaceae	Acinetobacter		3.48	0.0001528	-3.763	6.013e-05	NA	NA
Cluster_481	Bacteria	Proteobacteria	Gammaproteobacteria	Pseudomonadales	Pseudomonadaceae	Pseudomonas	Pseudomonas sp.	1.948	6.885e-05	NA	NA	NA	NA
Cluster_1587	Bacteria	Spirochaetota	Spirochaetia	Spirochaetales	Spirochaetaceae	Treponema		-2.861	3.742e-06	NA	NA	NA	NA
Cluster_1185	Bacteria	Spirochaetota	Spirochaetia	Spirochaetales	Spirochaetaceae	Treponema		-1.537	0.001717	NA	NA	NA	NA
Cluster_1608	Bacteria	Spirochaetota	Spirochaetia	Spirochaetales	Spirochaetaceae	Treponema		-1.299	0.00293	NA	NA	NA	NA
Cluster_220	Bacteria	Spirochaetota	Spirochaetia	Spirochaetales	Spirochaetaceae	Treponema		-1.187	0.0006326	NA	NA	NA	NA
Cluster_1721	Bacteria	Verrucomicrobiota	Verrucomicrobiae	Verrucomicrobiales	Akkermansiaceae	Akkermansia		1.673	0.0005706	-1.694	0.0006553	NA	NA

## Sheet: Table S5
Table S5. Differential abundance analysis of the total microbiota on teat skin at D15E. Cows were either treated with Lacticaseibacillus paracasei CIRM BIA 1542 (L), iodine (I) or not treated (N). log2FoldChange was used to quantify the difference of clusters abundance between I and L, L and N and finally I and N.
1 A positive log2FoldChange means more abundant in I than L while a negative log2FoldChange means less abundant in I than L.
2 NA means that no significant effect was observed for the identified cluster.
OTU	Kingdom	Phylum	Class	Order	Family	Genus	Species	log2FoldChange IL1	pval IL	log2FoldChange LN	pval LN	log2FoldChange IN	pval IN
Cluster_691	Bacteria	Actinobacteriota	Actinobacteria	Micrococcales	Brevibacteriaceae	Brevibacterium		5.823	1.255e-05	NA	NA	NA	NA
Cluster_1372	Bacteria	Bacteroidota	Bacteroidia	Bacteroidales				1.986	0.0003009	NA	NA	NA	NA
Cluster_485	Bacteria	Firmicutes	Bacilli	Bacillales	Planococcaceae	Lysinibacillus	Lysinibacillus sp.	4.613	1.426e-8	NA	NA	NA	NA
Cluster_276	Bacteria	Firmicutes	Bacilli	Lactobacillales	Carnobacteriaceae	Alloiococcus	bacterium #1 from Psoroptes ovis	-3.611	0.0001984	4.196	3.014e-05	NA	NA
Cluster_22	Bacteria	Firmicutes	Bacilli	Lactobacillales	Lactobacillaceae	Lacticaseibacillus	Lactobacillus paracasei	-11.83	6.728e-31	11.71	1.362e-28	NA	NA
Cluster_5	Bacteria	Firmicutes	Bacilli	Lactobacillales	Lactobacillaceae	Lacticaseibacillus	Multi-affiliation	-12.89	1.144e-40	12.96	1.426e-38	NA2	NA
Cluster_1217	Bacteria	Firmicutes	Bacilli	Lactobacillales	Lactobacillaceae	Lacticaseibacillus	Multi-affiliation	-7.894	9.267e-14	8.021	2.141e-13	NA	NA
Cluster_1687	Bacteria	Firmicutes	Bacilli	Lactobacillales	Lactobacillaceae	Lacticaseibacillus	Multi-affiliation	-6.916	8.677e-10	6.802	4.870e-9	NA	NA
Cluster_1027	Bacteria	Firmicutes	Bacilli	Lactobacillales	Lactobacillaceae	Leuconostoc	Multi-affiliation	5.392	2.997e-13	-4.092	1.105e-7	NA	NA
Cluster_1469	Bacteria	Firmicutes	Bacilli	Lactobacillales	Multi-affiliation	Multi-affiliation	Multi-affiliation	-7.113	1.781e-9	6.999	9.110e-9	NA	NA
Cluster_718	Bacteria	Firmicutes	Bacilli	Lactobacillales	Streptococcaceae	Lactococcus	Multi-affiliation	4.507	2.998e-11	-3.6	2.360e-7	NA	NA
Cluster_1210	Bacteria	Firmicutes	Clostridia	Monoglobales	Monoglobaceae	Monoglobus		4.077	3.298e-8	NA	NA	NA	NA
Cluster_1116	Bacteria	Firmicutes	Clostridia	Oscillospirales	[Eubacterium] coprostanoligenes group			1.954	6.49e-05	NA	NA	NA	NA
Cluster_775	Bacteria	Firmicutes	Clostridia	Oscillospirales	[Eubacterium] coprostanoligenes group			3.715	2.873e-9	NA	NA	NA	NA
Cluster_1779	Bacteria	Firmicutes	Clostridia	Oscillospirales	Oscillospiraceae	UCG-005		2.148	0.000241	NA	NA	NA	NA

## Sheet: Table S6
Table S6. Differential abundance analysis of the total microbiota in foremilk at D15. Cows were either treated with Lacticaseibacillus paracasei CIRM BIA 1542 (L), iodine (I) or not treated (N). log2FoldChange was used to quantify the difference of clusters abundance between I and L, L and N and finally I and N.
1 A positive log2FoldChange means more abundant in I than L while a negative log2FoldChange means less abundant in I than L.
2 NA means that no significant effect was observed for the identified cluster.
OTU	Kingdom	Phylum	Class	Order	Family	Genus	Species	log2FoldChange IL1	pval IL	log2FoldChange LN	pval LN	log2FoldChange IN	pval IN
Cluster_33	Bacteria	Actinobacteriota	Actinobacteria	Corynebacteriales	Corynebacteriaceae	Corynebacterium	Corynebacterium crudilactis	-23.29	1.294e-17	NA	NA	-21.97	8.805e-13
Cluster_59	Bacteria	Actinobacteriota	Actinobacteria	Corynebacteriales	Corynebacteriaceae	Corynebacterium	Corynebacterium faecale	-24.19	1.776e-19	NA	NA	-23.57	6.172e-15
Cluster_168	Bacteria	Actinobacteriota	Actinobacteria	Corynebacteriales	Corynebacteriaceae	Corynebacterium	Corynebacterium faecale	19.3	2.886e-8	-23.85	2.503e-11	NA	NA
Cluster_1139	Bacteria	Actinobacteriota	Coriobacteriia	Coriobacteriales	Atopobiaceae	Olsenella		-18.65	7.968e-8	29.39	3.077e-16	NA	NA
Cluster_403	Bacteria	Bacteroidota	Bacteroidia	Bacteroidales	Prevotellaceae	Prevotellaceae UCG-001		30	3.818e-18	NA	NA	22.09	1.674e-8
Cluster_350	Bacteria	Firmicutes	Bacilli	Erysipelotrichales	Erysipelotrichaceae	[Anaerorhabdus] furcosa group		-20.91	9.585e-12	NA	NA	-22.25	1.300e-10
Cluster_40	Bacteria	Firmicutes	Bacilli	Lactobacillales	Aerococcaceae	Aerococcus	Aerococcus suis	-10.35	5.874e-05	NA	NA	-10.87	0.0001814
Cluster_227	Bacteria	Firmicutes	Bacilli	Lactobacillales	Carnobacteriaceae	Atopostipes		-19.53	1.370e-8	NA	NA	-21.68	2.270e-8
Cluster_22	Bacteria	Firmicutes	Bacilli	Lactobacillales	Lactobacillaceae	Lacticaseibacillus	Lactobacillus paracasei	-24.2	1.861e-22	NA2	NA	-17.32	8.099e-10
Cluster_420	Bacteria	Firmicutes	Clostridia	Clostridia UCG-014				-18.65	7.968e-8	29.39	3.077e-16	NA	NA
Cluster_306	Bacteria	Firmicutes	Clostridia	Lachnospirales	Lachnospiraceae	[Eubacterium] hallii group		-22.26	1.177e-12	NA	NA	-17.2	1.341e-06
Cluster_759	Bacteria	Firmicutes	Clostridia	Lachnospirales	Lachnospiraceae	Acetitomaculum		-20.1	7.041e-9	30.57	1.786e-17	NA	NA
Cluster_500	Bacteria	Firmicutes	Clostridia	Lachnospirales	Lachnospiraceae	Cellulosilyticum		24.5	6.465e-15	-22.95	1.735e-12	NA	NA
Cluster_533	Bacteria	Firmicutes	Clostridia	Monoglobales	Monoglobaceae	Monoglobus		-21.47	5.855e-10	NA	NA	-20.47	1.688e-7
Cluster_99	Bacteria	Firmicutes	Clostridia	Monoglobales	Monoglobaceae	Monoglobus		-10.11	0.000753	NA	NA	NA	NA
Cluster_818	Bacteria	Firmicutes	Clostridia	Oscillospirales	Oscillospiraceae	UCG-005		-18.65	7.968e-8	29.39	3.077e-16	NA	NA
Cluster_1157	Bacteria	Firmicutes	Clostridia	Oscillospirales	UCG-010			-18.65	7.968e-8	29.39	3.077e-16	NA	NA
Cluster_935	Bacteria	Firmicutes	Clostridia	Peptostreptococcales-Tissierellales	Family XI	Anaerococcus		-21.66	5.009e-11	NA	NA	-22.52	1.407e-9
Cluster_1273	Bacteria	Patescibacteria	Parcubacteria	Candidatus Nomurabacteria			Parcubacteria bacterium RAAC4_OD1_1	-22.01	2.130e-10	NA	NA	-22.16	1.473e-8
Cluster_261	Bacteria	Patescibacteria	Saccharimonadia	Saccharimonadales	Saccharimonadaceae	Candidatus Saccharimonas		-22.51	7.182e-12	NA	NA	-20.47	3.411e-8

## Sheet: Table S7
Table S7. Differential abundance analysis of the total microbiota in foremilk at D15E. Cows were either treated with Lacticaseibacillus paracasei CIRM BIA 1542 (L), iodine (I) or not treated (N). log2FoldChange was used to quantify the difference of clusters abundance between I and L, L and N and finally I and N.
1 A positive log2FoldChange means more abundant in I than L while a negative log2FoldChange means less abundant in I than L.
2 NA means that no significant effect was observed for the identified cluster.
OTU	Kingdom	Phylum	Class	Order	Family	Genus	Species	log2FoldChange IL1	pval IL	log2FoldChange LN	pval LN	log2FoldChange IN	pval IN
Cluster_22	Bacteria	Firmicutes	Bacilli	Lactobacillales	Lactobacillaceae	Lacticaseibacillus	Lactobacillus paracasei	-11.38	9.745e-17	11.12	2.479e-15	NA	NA
Cluster_5	Bacteria	Firmicutes	Bacilli	Lactobacillales	Lactobacillaceae	Lacticaseibacillus	Multi-affiliation	-13.33	3.575e-23	9.637	3.172e-14	NA2	NA
Cluster_1217	Bacteria	Firmicutes	Bacilli	Lactobacillales	Lactobacillaceae	Lacticaseibacillus	Multi-affiliation	-6.609	2.445e-05	6.874	1.926e-05	NA	NA
Cluster_718	Bacteria	Firmicutes	Bacilli	Lactobacillales	Streptococcaceae	Lactococcus	Multi-affiliation	7.329	1.125e-05	NA	NA	NA	NA

## Sheet: Table S8
Table S8. Impact of post-milking treatment on different immune markers at the animal level before treatment (D1). Cows were either treated with Lacticaseibacillus paracasei CIRM BIA 1542 (L), iodine (I) or not treated (N).
1 ANOVA analysis based on mixed models followed by a post-hoc test was used to obtain statistical data. *** p < 0.001, ** p < 0.01, * p < 0.05, . p < 0.1. NS means not significant.
2 Milk somatic cells typing was performed by fluorescence-Activated Cell Sorting (FACS) using a panel of antibodies. The cells labelled with CH138+ were identified as granulocyte.
3 Data are expressed in Emmean ± SEM where Emmean is the mean estimated by the statistical model using D1 as covariate and SEM, the maximal standard error.
4 Plasma concentrations.
	D1
	N (n=6)	I (n=6)	L (n=8)	SEM	Treatment1
Granulocytes (%)2	53.53	46.8	51.5	3.13	NS
Cortisol (ng/mL)4	11.9	9.07	13.1	1.81	NS
Haptoglobine (mg/mL)4	0.43	0.45	0.43	0.029	NS

## Sheet: Table S9
Table S9. Expression of genes of interleukins 8 (CXCL8) and 6 (IL6), related to the immune response, and cadherin 1 (CDH1), alpha lactalbumin (LALBA) and kappa casein (CSN3), related to epithelium integrity and functionality in epithelial cells recovered from composite milk samples before treatment (D1).
Cows were either treated with Lacticaseibacillus paracasei CIRM BIA 1542 (L), iodine (I) or not treated (N).
1 ANOVA analysis based on mixed models followed by a post-hoc test was used to obtain statistical data. *** p < 0.001, ** p < 0.01, * p < 0.05. NS means not significant. a, b means significant difference (P < 0.05) at a specific day.
2 Data are expressed in Mean ± SEM where SEM is the maximal standard error.
3 The mRNA levels of the studied genes were expressed relative to the geometric mean of 3 housekeeping genes: RPLP0, RPS5 and RPL19 and expressed as a semi-absolute number of mRNA molecules, multiplied by 108 and log-transformed.
		D1
		N (n=6)	I (n=6)	L (n=8)	SEM	Treatment1
Immune response2,3
Interleukin 8	CXCL8	9.40a	9.97b	9.32a	0.134	**
Interleukin 6	IL6	5.66ab	5.36a	5.88b	0.123	*
Mammary epithelium integrity and synthesis2,3
Kappa casein	CSN3	10.3	10.4	10.2	0.120	NS
Alpha lactalbumin	LALBA	11.6	11.5	11.5	0.180	NS
Cadherin 1	CDH1	7.51a	7.28b	7.16b	0.064	***

## Sheet: Table S10
Table S10. Impact of post-milking treatment on integrity and functionality of mammary epithelium before (D1) and following treatment (D26).
Cows were either treated with Lacticaseibacillus paracasei CIRM BIA 1542 (L), iodine (I) or not treated (N).
1 ANOVA analysis based on mixed models followed by a post-hoc test was used to obtain statistical data. ** p < 0.01, * p < 0.05, . p < 0.1. NS means not significant. a, b means significant difference (P < 0.05) at a specific day.
2 Data are expressed in Emmean ± SEM where Emmean is the mean estimated by the statistical model using D1 as covariate and SEM, the maximal standard error.
3 Milk somatic cells typing was performed by fluorescence-Activated Cell Sorting (FACS) using a panel of antibodies. The cells labelled with CD49f were identified as MEC.
		D1					D26
		N (n=6)	I (n=6)	L (n=8)	SEM	Treatment1	N (n=6)	I (n=6)	L (n=8)	SEM	Treatment
Mammary epithelium integrity2	MEC exfoliation in milk rate (x103 cells/day)	58.5	12.4	15.9	32.3	.
	Milk Na+ concentration (mg/kg)	293	293	302	6.01	NS
	Milk K+ concentration (x103 mg/kg)	1.85a	1.77b	1.74b	0.232	**
	Milk Na+/K+ ratio	16.1a	16.8ab	17.6b	0.338	**
	Lactose in blood (mg/L)	79.8	51.5	50.5	24.5	NS
	MEC (%)3	6.48a	11.67b	7.70ab	1.43	**
Mammary epithelium fonctionnality2	Milk yield (kg/day)	29.7a	31.7b	30.0ab	0.566	*	30.7	30.2	30.4	0.279	NS
	Milk fat content (g/kg)	41.6	40.6	41.6	1.077	NS	41.9	40.2	41.7	0.813	NS
	Milk protein content (g/kg)	36.9	36.3	35.9	0.960	NS	32.2	31.9	30.6	1.401	NS
	Lactose in milk (g/kg)	48.6	48.8	49.9	0.470	.	49.0ab	48.8a	50.3b	0.491	.

[truncated: 1 more sheets: ESM]
